# Supplementary material
Source: publisher figshare collection journal article supplement (https://frontiersin.figshare.com/ndownloader/files/17852951)
Supplement: Supplementary file [file 17852951]

**Table S3:** Comparison of residues constituting the catalytic triad, sub-site I, and sub-site II in IsPETase and SM14est. Residue substitutions in SM14est are indicated with an asterisk, and those substitutions involving amino acids with similar biochemical properties are indicated with two asterisks.

|                        | Residue in IsPETase | Residue in SM14est |
|------------------------|---------------------|--------------------|
| <b>Catalytic triad</b> | Ser160              | Ser156             |
|                        | Asp206              | Asp202             |
|                        | His237              | His234             |
| <b>Sub-site I</b>      | Tyr87               | Tyr88              |
|                        | Met161              | Met157             |
|                        | Trp185              | Trp181             |
|                        | Ile208              | Ile204             |
| <b>Sub-site II</b>     | Thr88               | Thr89              |
|                        | Ala89               | Ala90              |
|                        | Trp159              | His155*            |
|                        | Ile232              | Leu229**           |
|                        | Asn233              | Arg230*            |
|                        | Ser236              | Gly233*            |
|                        | Ser238              | Phe235*            |
|                        | Asn241              | Asn238             |
|                        | Asn244              | Asn241             |
|                        | Ser245              | Thr242**           |
|                        | Asn246              | -*                 |

Arg280

Gly277\*

---
